# Supplementary material
Source: PubMed Central journal article supplement (PMC8601651)
Supplement: NIHMS1700570-supplement-1.pdf [file NIHMS1700570-supplement-1.pdf]

Supplemental Table 1. Patients in the study with achalasia

| Patient ID # | Gender | Age | BMI  | Race             | Achalasia subtype | Varicella vaccine | PPI use | Surgery                          |
|--------------|--------|-----|------|------------------|-------------------|-------------------|---------|----------------------------------|
| 1            | Male   | 68  | 33.5 | Caucasian        | 2                 | No                | Yes     | Heller Myotomy                   |
| 2            | Female | 63  | 35.5 | Caucasian        | 3                 | No                | Yes     | Heller Myotomy                   |
| 3            | Male   | 55  | 35.6 | Caucasian        | 3                 | No                | Yes     | Heller Myotomy                   |
| 4            | Male   | 65  | 19.3 | Caucasian        | 2                 | No                | Yes     | Heller Myotomy                   |
| 5            | Female | 41  | 19.9 | Caucasian        | 2                 | No                | Yes     | Heller Myotomy                   |
| 6            | Female | 75  | 21.6 | Caucasian        | 1                 | No                | Yes     | Heller Myotomy                   |
| 7            | Male   | 72  | 20.1 | African-American | 3                 | No                | Yes     | Heller Myotomy                   |
| 8            | Male   | 71  | 29.3 | Caucasian        | 2                 | No                | Yes     | Heller Myotomy and Esophagectomy |
| 9            | Male   | 48  | 18.2 | Caucasian        | 2                 | No                | Yes     | Heller Myotomy                   |
| 10           | Male   | 77  | 26.3 | Caucasian        | 3                 | No                | Yes     | Heller Myotomy                   |
| 11           | Male   | 60  | 29.3 | Caucasian        | 1                 | No                | Yes     | Heller Myotomy                   |
| 12           | Female | 70  | 24.3 | Caucasian        | 2                 | No                | Yes     | Heller Myotomy                   |

---

|    |        |    |      |           |   |    |     |                |
|----|--------|----|------|-----------|---|----|-----|----------------|
| 13 | Female | 18 | 21.2 | Caucasian | 2 | No | Yes | Heller Myotomy |
| 14 | Female | 81 | 29.8 | Caucasian | 1 | No | Yes | Heller Myotomy |
| 15 | Male   | 36 | 28.0 | Caucasian | 2 | No | Yes | Heller Myotomy |

---

Journal Pre-proof

Table 2. VZV gene expression in patients with achalasia undergoing myotomy

| Patient | Saliva | DNA | Transcripts | Protein |
|---------|--------|-----|-------------|---------|
| v1      | +      | +   | +           | +       |
| v2      | +      | +   | +           | +       |
| v3      | +      | -   | -           | -       |
| v5      | +      | -   | +           | +       |
| v6      | +      | -   | +           | +       |
| v7      | -      | +   | +           | +       |
| v8      | -      | -   | +           | -       |
| v9      | -      | +   | +           | -       |
| v11     | +      | -   | -           | -       |
| v12     | +      | -   | +           | +       |
| v13     | +      | -   | +           | -       |
| v14     | +      | +   | +           | +       |
| v15     | +      | +   | +           | +       |
| v16     | +      | +   | +           | +       |
| v17     | +      | -   | +           | +       |

## **Supplementary Methods:**

The study was approved by the Vanderbilt University Medical Center and Columbia University's Institutional Review Boards (IRB #191284). All patients provided informed consent.

### **Collection and processing of specimens**

During Heller myotomy, a surgical specimen of the LES muscularis propria was excised and placed on ice, and immediately transported for processing. A portion of the specimen was fixed with 4.0% formaldehyde (from paraformaldehyde) in 0.1 M phosphate buffer and prepared for histological examination. Slides were stained with hematoxylin and eosin (H&E) and reviewed by an expert gastroenterologist pathologist (MKW). The remainder of the tissue was set aside to be processed for the analysis of VZV DNA, transcripts, and protein.

Saliva was collected by passive drool into the tubes of OriGene-Discover kits (Ottawa, Canada) or on swabs placed in the mouth for approximately 3 minutes. Swabs were subsequently soaked in sterile water and stored in buffer (50 mM Tris, pH 8.0, 1 mM ethylenediaminetetraacetic acid, 0.1% sodium azide) at 4°C. DNA was extracted with DNeasy Blood and Tissue Kit (Qiagen, Valencia, California).

### **PCR analysis and immunocytochemistry**

Tissue specimens to be analyzed were divided. One portion, which had been fixed in 0.1 M phosphate-buffered 4% formaldehyde (from paraformaldehyde), was embedded in OCT medium, frozen with liquid N<sub>2</sub> and sectioned in a cryostat-microtome for

immunocytochemistry. DNA was extracted from the remaining tissue (DNeasy Blood and Tissue Kit; Qiagen, Valencia, CA). DNA (100 ng) was subjected to PCR amplification (Eppendorf SmartCycler) in 20  $\mu$ l of reaction mixture for 35 cycles. The PCR product (1.0  $\mu$ l) was subjected to further amplification with sets of nested primers for each of the genes analyzed for an additional 32 cycles. Precautions taken to avoid contamination included opening PCR tubes only in a fume hood and analysis of negative control samples simultaneously with experimental samples. Cellular DNA was also examined with primers for human  $\beta$ -globin or glyceraldehyde 3-phosphate dehydrogenase to validate the detection of DNA. Cellular genes were amplified in every experiment. Primers used for PCR and nested PCR were designed to amplify VZV ORFs 29, 40, and 67 (Table1). PCR products were separated on 2% agarose gels, and digital images were obtained for documentation. RNA was extracted with Trizol (Invitrogen, Carlsbad, CA; manufacturer's instructions were followed) from the same tissue from which DNA was extracted. RNA was treated with DNase I (4U/100  $\mu$ l) to remove possible DNA contamination. Total RNA (3.0  $\mu$ g) was subjected to reverse transcription with Maloney Murine Leukemia Virus reverse transcriptase (Promega, Madison, WI) in 25  $\mu$ l of reaction mixture to obtain cDNA. The cDNA (1.0  $\mu$ l) was subjected to PCR amplification in 20  $\mu$ l of reaction mixture for each of the genes analyzed.  $\beta$ -actin universal primers were used as controls both for RNA extraction and cDNA preparation.

Sections of fixed frozen tissue were immunostained to identify neuronal cell bodies, neurites, and VZV late antigens in myenteric ganglia. Antibodies to  $\beta$ 3-tubulin (Thermo Fisher), PGP9.5 (ubiquitin carboxyl terminal hydrolase 1 [UCHL1]; rabbit monoclonal, Invitrogen), and peripherin (rabbit monoclonal, EnCor Biotechnology) were used as

neural markers. Antibodies to gE (ORF68; monoclonal; Virusys Corporation), gH (ORF37; monoclonal, Virusys Corporation), and ORF40p (mouse monoclonal; Novus Biologicals) were used to detect cells and processes infected with VZV. Sites of primary antibody binding were detected with appropriate species-specific secondary antibodies labeled with contrasting fluorophores (Alexa 488 or 594; Thermo Fisher Invitrogen). After immunostaining, slides were treated with True View™ (Vector Laboratories) for 30-40 sec at room temperature to quench autofluorescence (primarily of elastic fibers). Negative controls, in which primary antibodies were omitted, were processed along with the experimentally analyzed tissues. Nuclei were sometimes counterstained with bisbenzimidazole (Sigma-Aldrich, St. Louis, MO) to aid the morphological examination of tissue.

#### **Data Collection, Statistics, and Rigor**

Patient characteristics and data collected from physiological testing and immunocytochemistry were collected and stored into REDCap (Research Electronic Data Capture). Confounding bias was addressed by collecting relevant information on biological and physiological data. Analysis of the results of the data used the statistical package R (4.0.2, <http://www.r-project.org>, R Foundation for Statistical Computing and GraphPad Prism version 9 for Macintosh).
